# Supplementary material
Source: PubMed Central journal article supplement (PMC4855302)

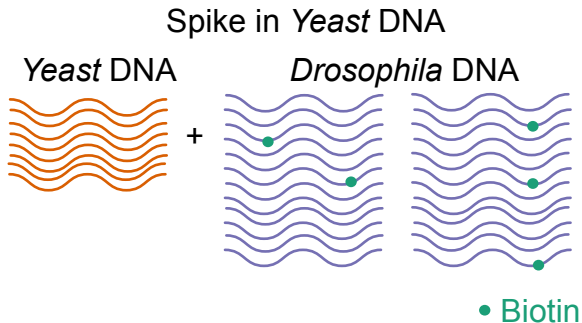

Pull-down with Streptavidin Beads

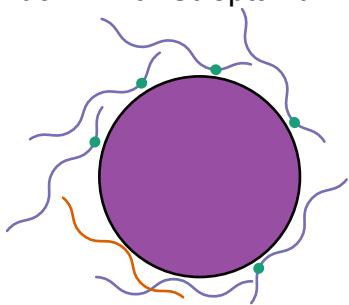

Purify Bound DNA

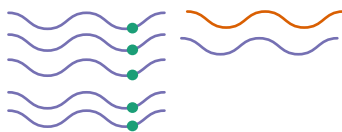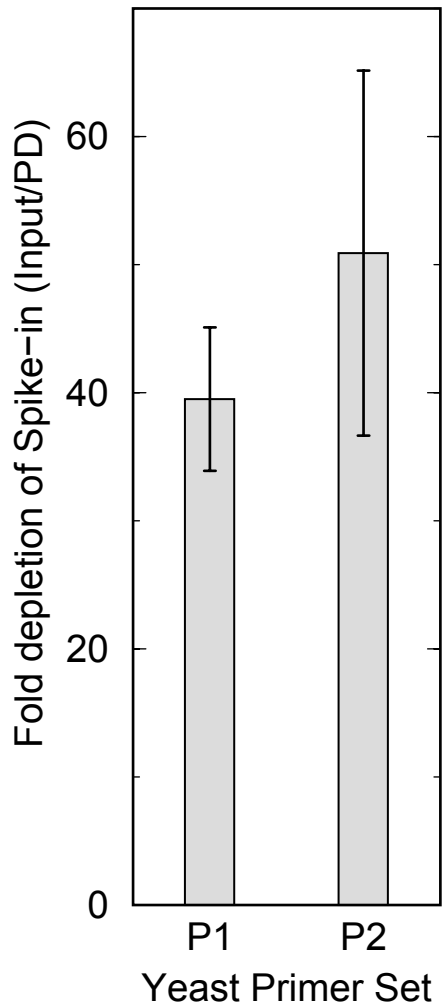

Supplement: NIHMS772603-supplement-Supp_Fig_1.pdf [file NIHMS772603-supplement-Supp_Fig_1.pdf]

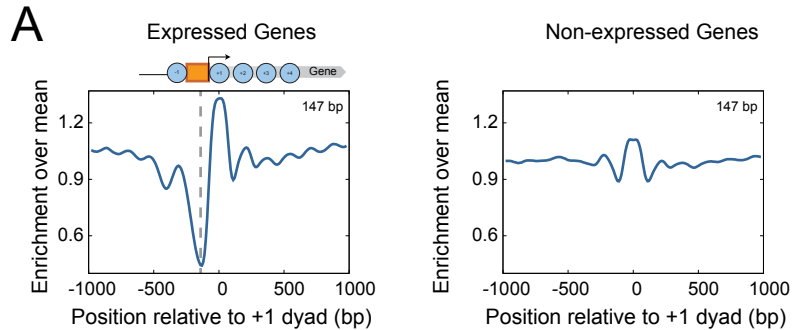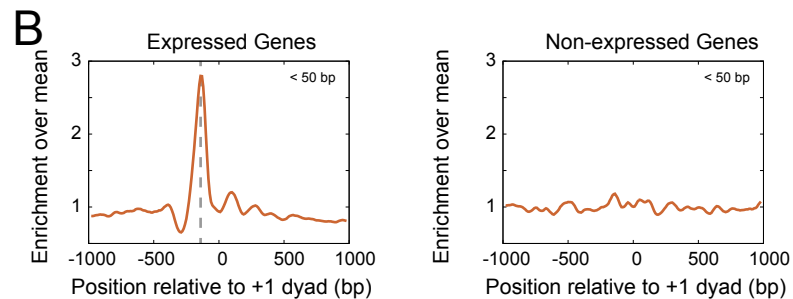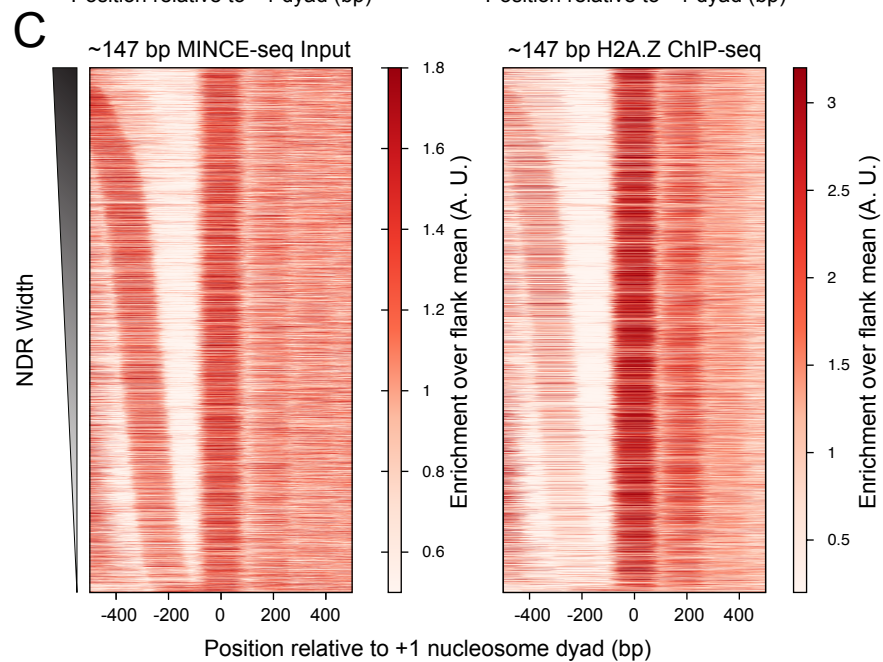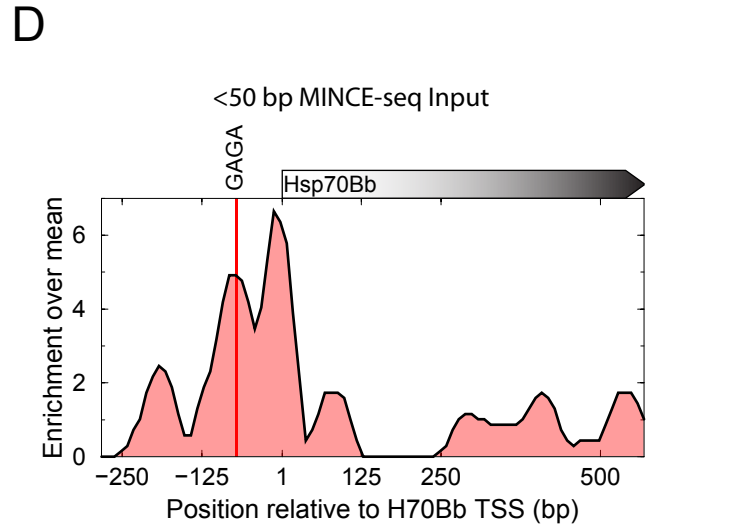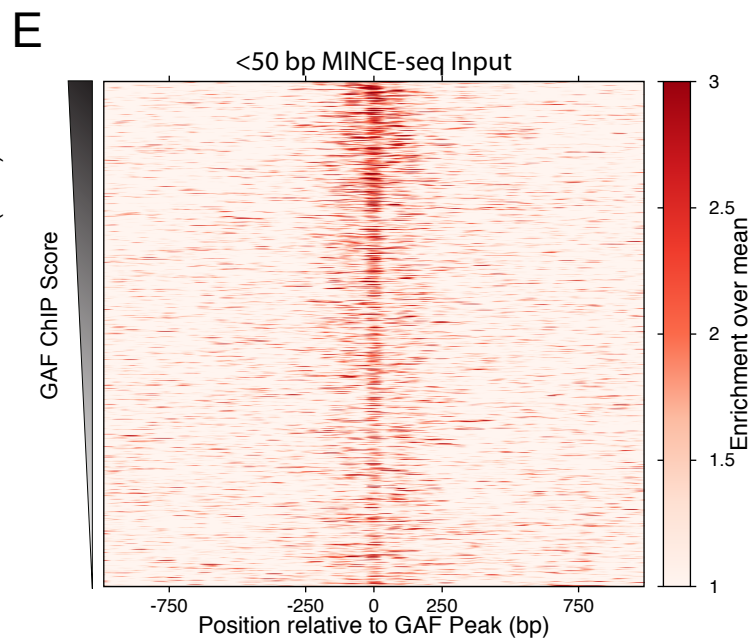

Supplement: NIHMS772603-supplement-Supp_Fig_2.pdf [file NIHMS772603-supplement-Supp_Fig_2.pdf]

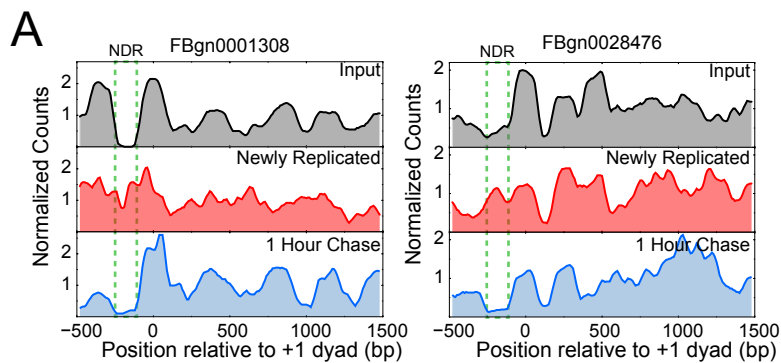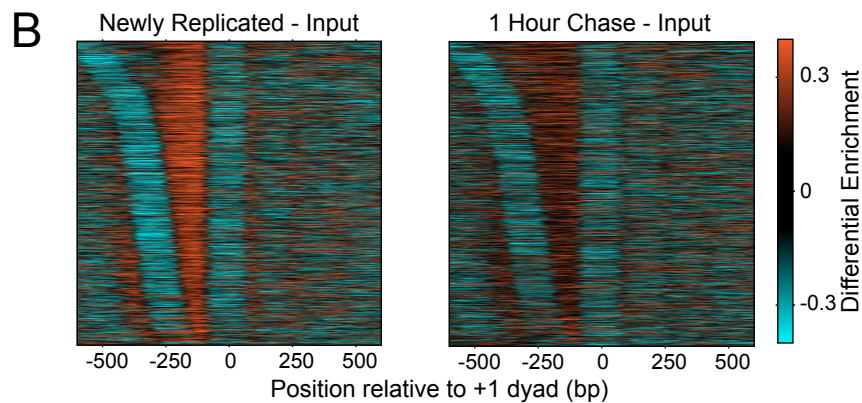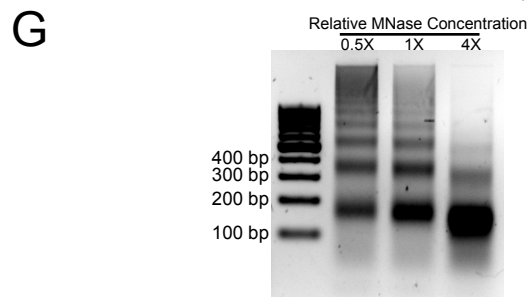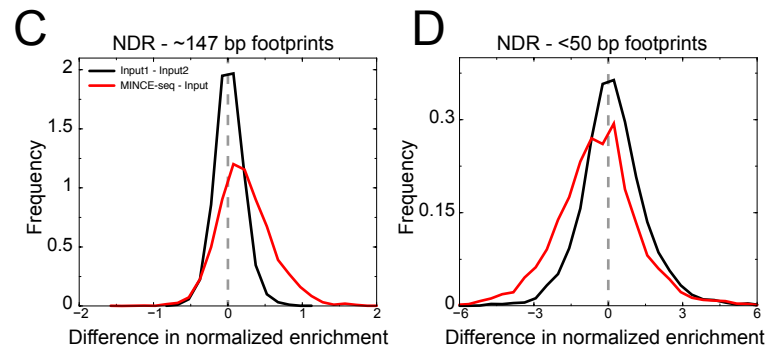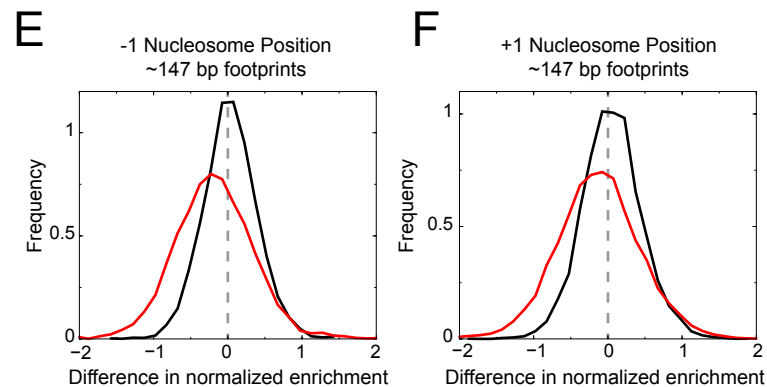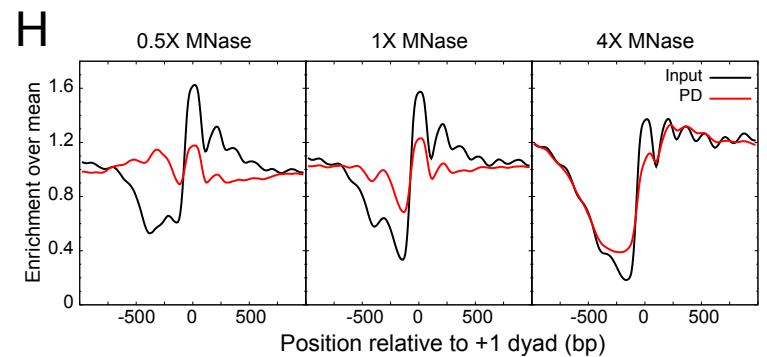

Supplement: NIHMS772603-supplement-Supp_Fig_3.pdf [file NIHMS772603-supplement-Supp_Fig_3.pdf]

**A**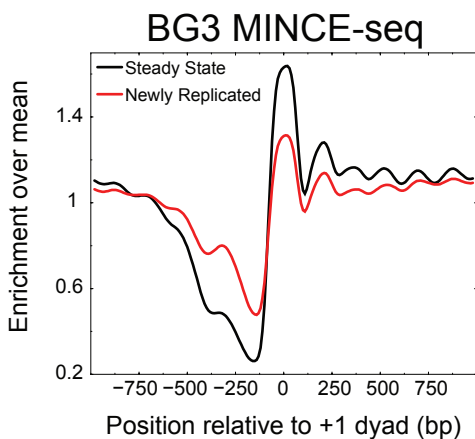**B**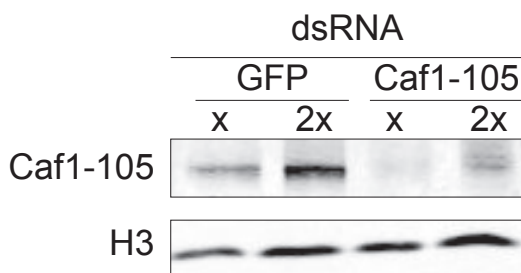**C**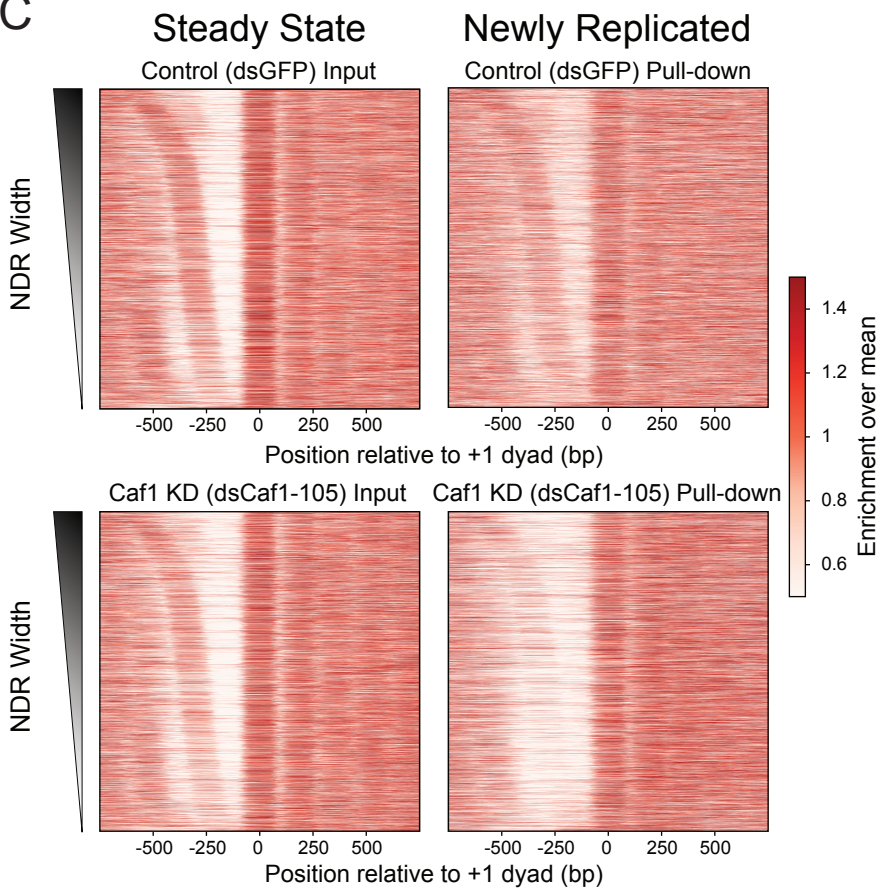

Supplement: NIHMS772603-supplement-Supp_Fig_4.pdf [file NIHMS772603-supplement-Supp_Fig_4.pdf]

**A**

~147 bp fragments

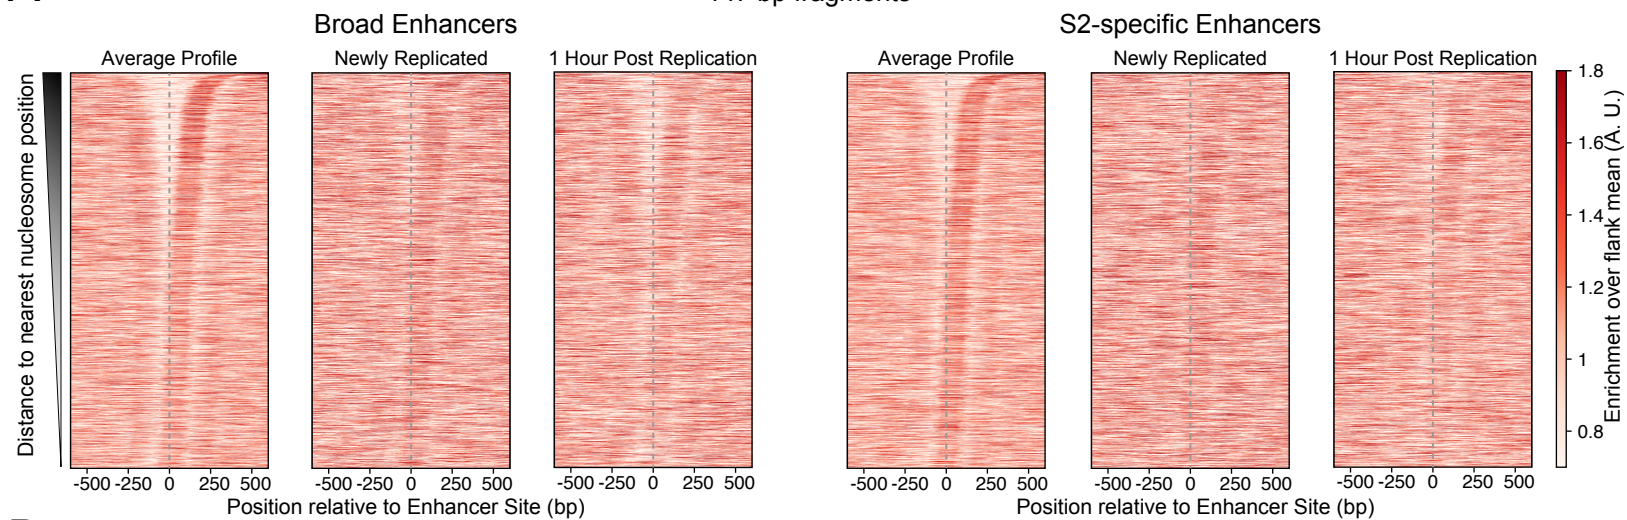**B**

~50 bp fragments

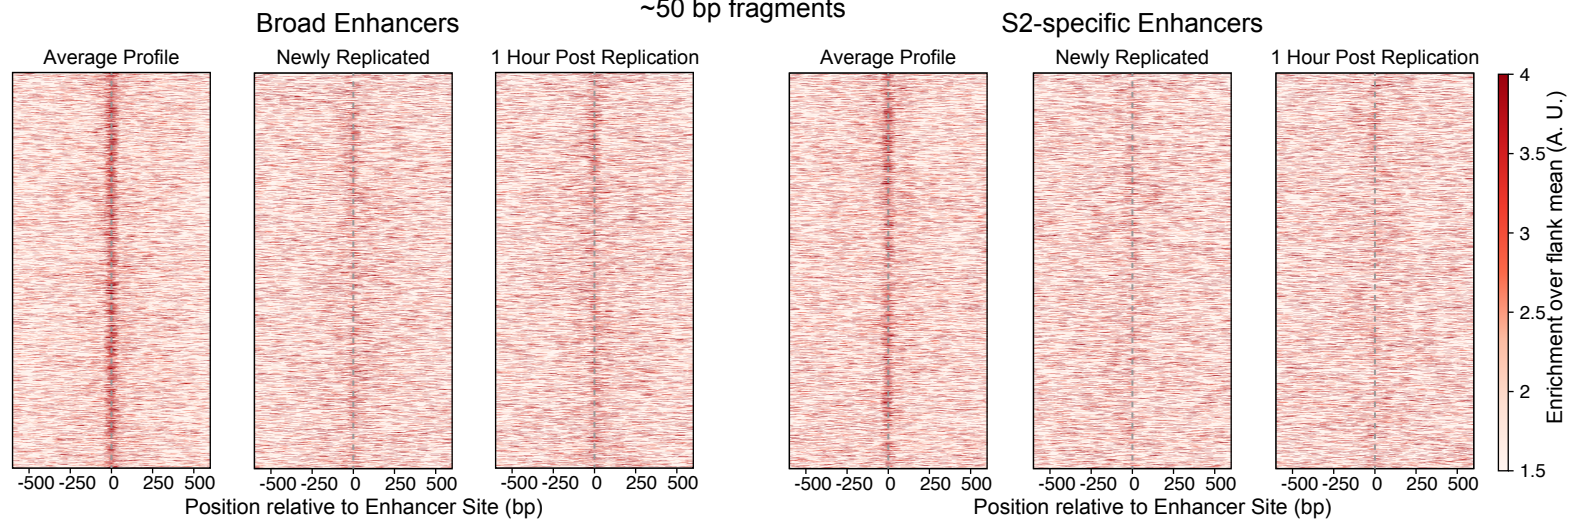**C**

Sites Unique to BG3

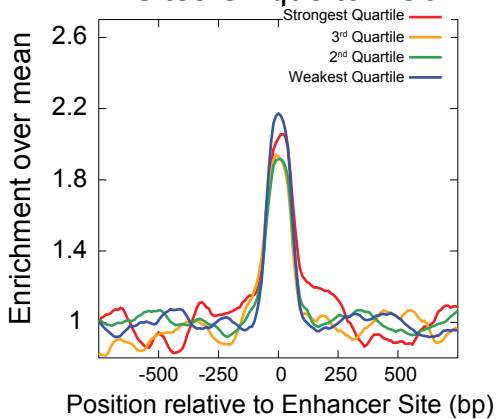**D**

Sites Unique to OSC

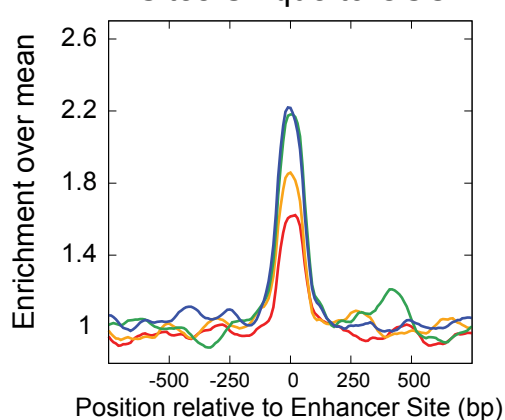**E**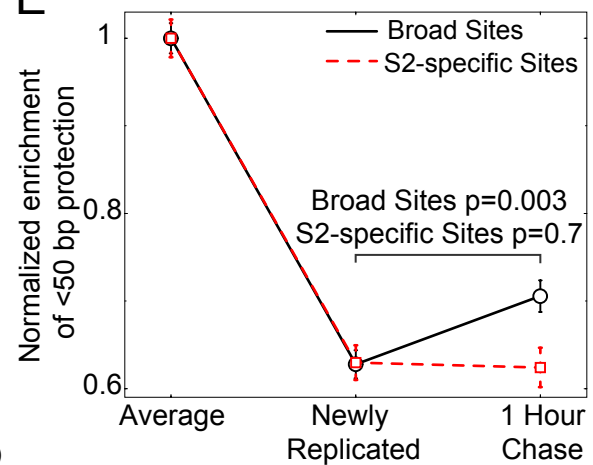

Supplement: NIHMS772603-supplement-Supp_Fig_5.pdf [file NIHMS772603-supplement-Supp_Fig_5.pdf]
